# Supplementary material for: Lipid Correction for Carbon Stable Isotope Analysis of Yellowfin Tuna
Source: MDPI journal article supplement (doi:10.3390/fishes8090446), 2023-09-01
Supplement: s1 [file s1]

**Table S1.** Summary data for yellowfin tuna samples selected for lipid extraction.

| ID | Date Collected | Length (cm) | Sex | C:N <sub>Untreated</sub> |
|----|----------------|-------------|-----|--------------------------|
| 1  | 5/31/2019      | 118.5       | F   | 2.957                    |
| 2  | 5/5/2019       | 115.5       | M   | 3.010                    |
| 3  | 9/6/2019       | 153.5       | F   | 3.056                    |
| 4  | 1/25/2020      | 83.0        | F   | 3.106                    |
| 5  | 5/15/2019      | 94.0        | M   | 3.121                    |
| 6  | 2/25/2020      | 89.5        | F   | 3.137                    |
| 7  | 3/13/2020      | 90.0        | F   | 3.152                    |
| 8  | 1/16/2020      | 90.0        | M   | 3.177                    |
| 9  | 5/15/2019      | 106.0       | F   | 3.201                    |
| 10 | 5/5/2019       | 96.0        | F   | 3.251                    |
| 11 | 11/22/2019     | 84.0        | M   | 3.295                    |
| 12 | 9/6/2019       | 76.0        | F   | 3.340                    |
| 13 | 10/11/2019     | 107.5       | M   | 3.386                    |
| 14 | 4/6/2019       | 102.0       | F   | 3.433                    |
| 15 | 9/27/2019      | 72.0        | M   | 3.495                    |
| 16 | 11/11/2019     | 82.0        | F   | 3.549                    |
| 17 | 1/26/2020      | 151.0       | M   | 3.608                    |
| 18 | 11/22/2019     | 135.0       | F   | 3.661                    |
| 19 | 11/17/2019     | 81.5        | F   | 3.712                    |
| 20 | 9/27/2019      | 147.0       | F   | 3.737                    |
| 21 | 12/8/2019      | 82.0        | M   | 3.772                    |
| 22 | 1/16/2020      | 124.0       | M   | 3.825                    |
| 23 | 12/15/2019     | 90.5        | M   | 3.952                    |
| 24 | 1/26/2020      | 121.0       | F   | 3.985                    |
| 25 | 2/25/2020      | 108.5       | F   | 4.085                    |
| 26 | 4/11/2019      | 137.5       | F   | 4.142                    |
| 27 | 1/26/2020      | 101.0       | F   | 4.224                    |
| 28 | 1/25/2020      | 130.0       | F   | 4.385                    |
| 29 | 5/5/2019       | 151.0       | M   | 4.516                    |

|    |           |       |   |       |
|----|-----------|-------|---|-------|
| 30 | 2/8/2020  | 157.0 | M | 4.612 |
| 31 | 1/25/2020 | 139.0 | F | 4.755 |
| 32 | 3/16/2020 | 147.5 | M | 5.129 |
| 33 | 2/25/2020 | 147.0 | F | 5.353 |
| 34 | 2/25/2020 | 139.0 | F | 5.923 |
| 35 | 3/16/2020 | 149.0 | F | 6.091 |
| 36 | 2/25/2020 | 144.5 | F | 6.493 |

---
